# Supplementary material for: Blood pressure in relation to general and central adiposity among 500 000 adult Chinese men and women
Source: PubMed Central journal article supplement (PMC4588860; doi:10.1093/ije/dyv012), 2015-03-05
Supplement: supp_dyv012_ije-2014-09-1084-File009.pdf [file supp_dyv012_ije-2014-09-1084-File009.pdf]

**Web figure 1. Systolic blood pressure versus BMI and body fat percentage, before (solid lines) and after (dashed lines) adjustment for each other**

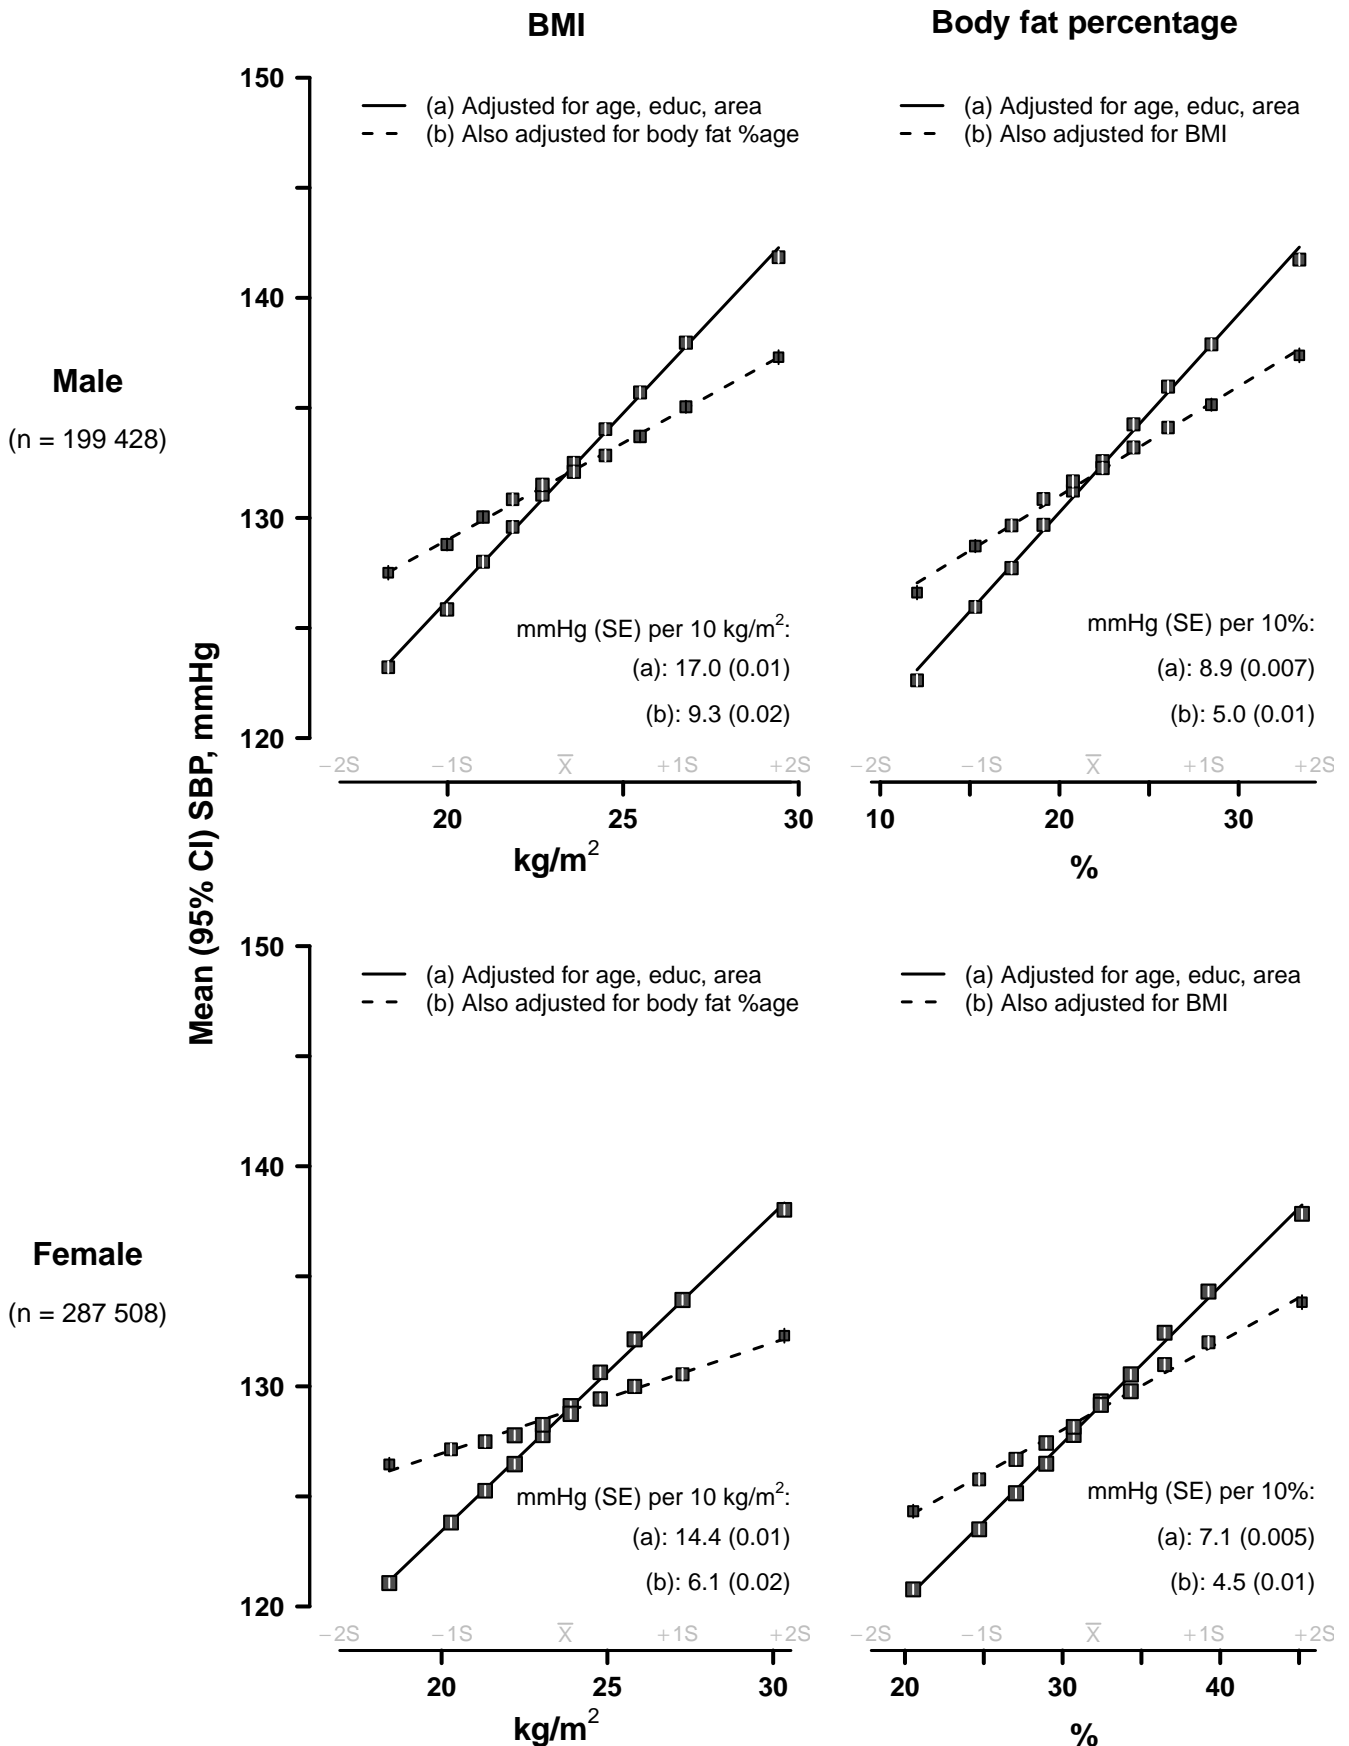

**Web figure 2. Diastolic blood pressure versus height-adjusted weight and BMI, before (solid lines) and after (dashed lines) adjustment for waist circumference**

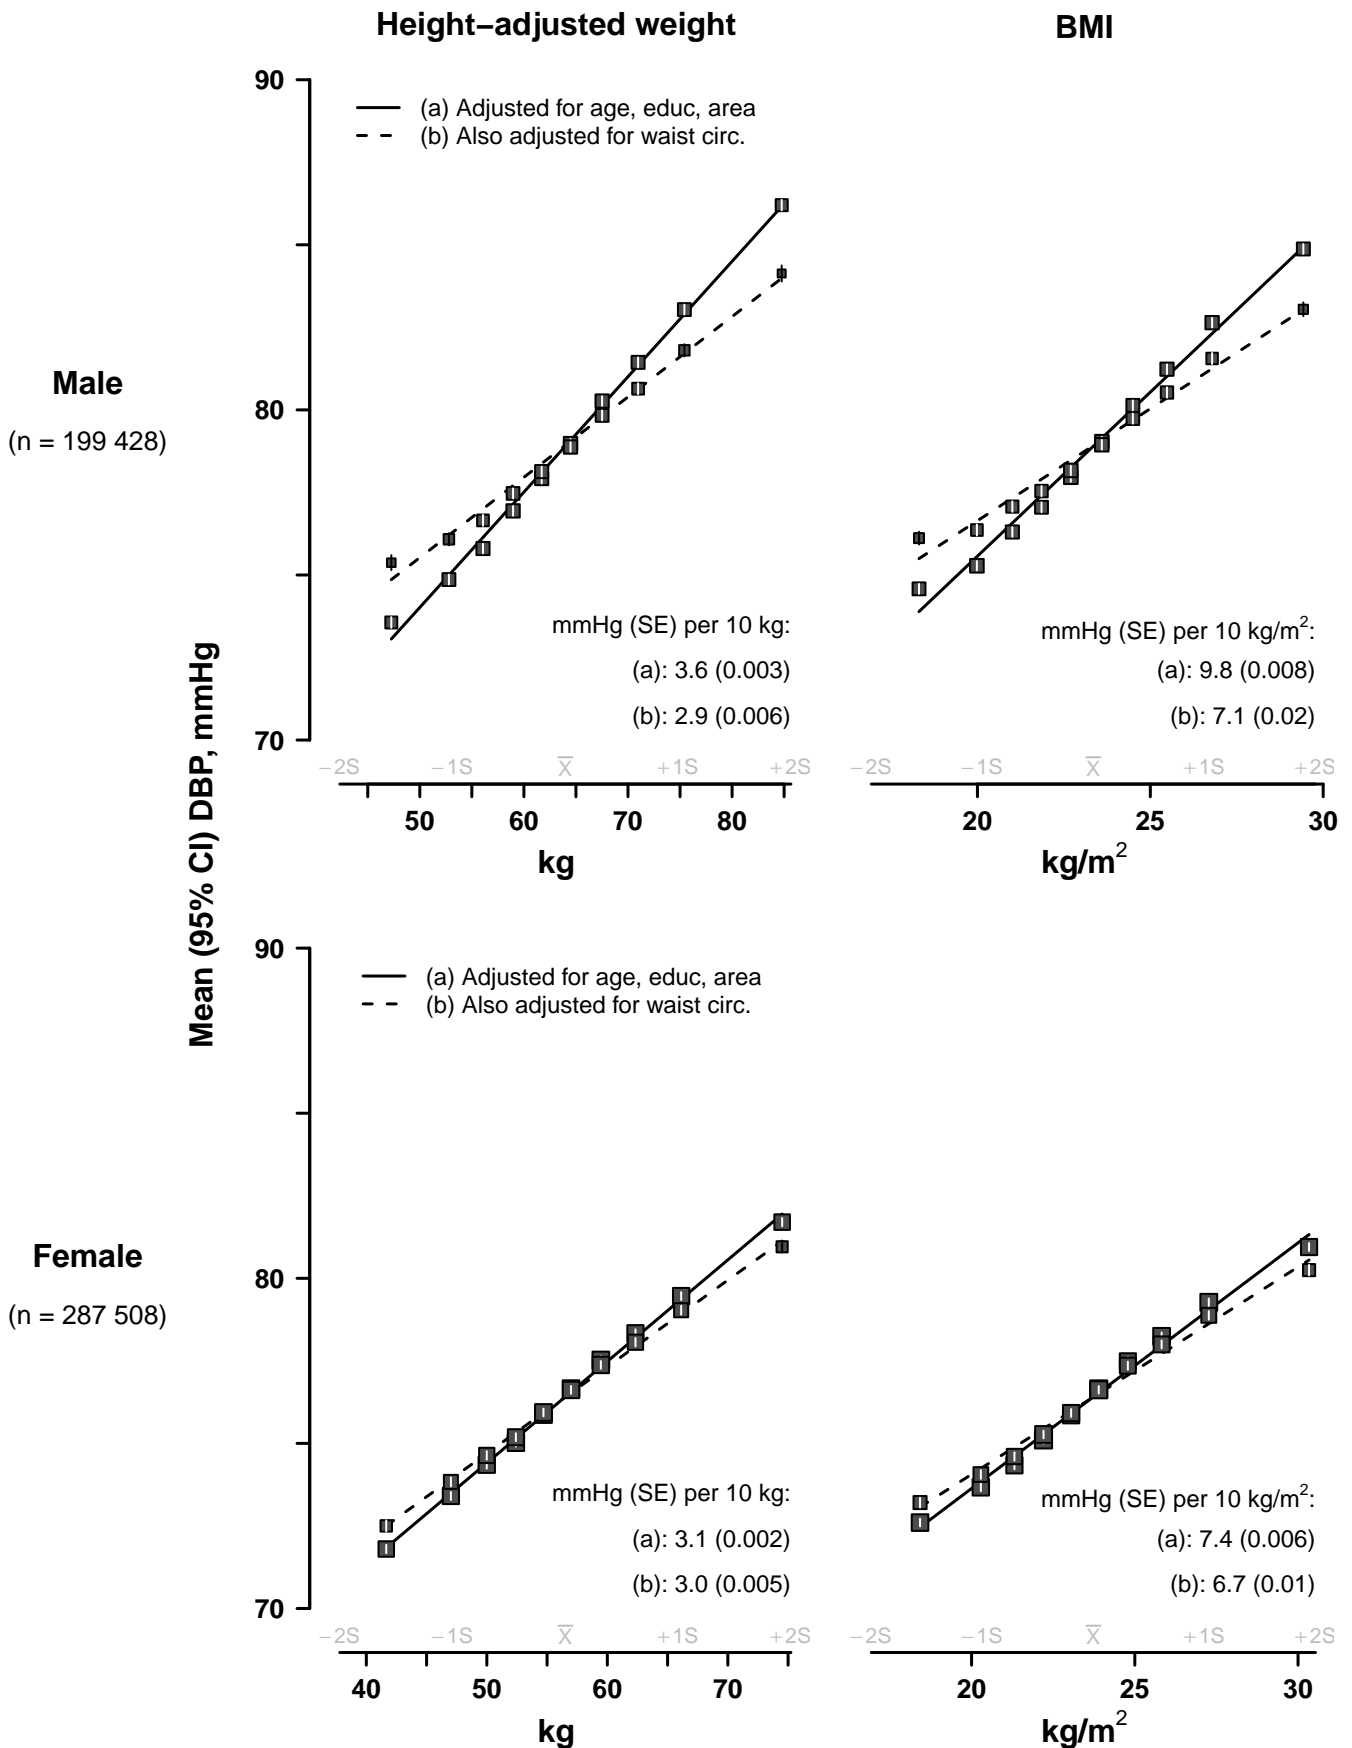

**Web figure 3. Diastolic blood pressure versus waist and hip circumference, before (solid lines) and after (dashed lines) adjustment for BMI**

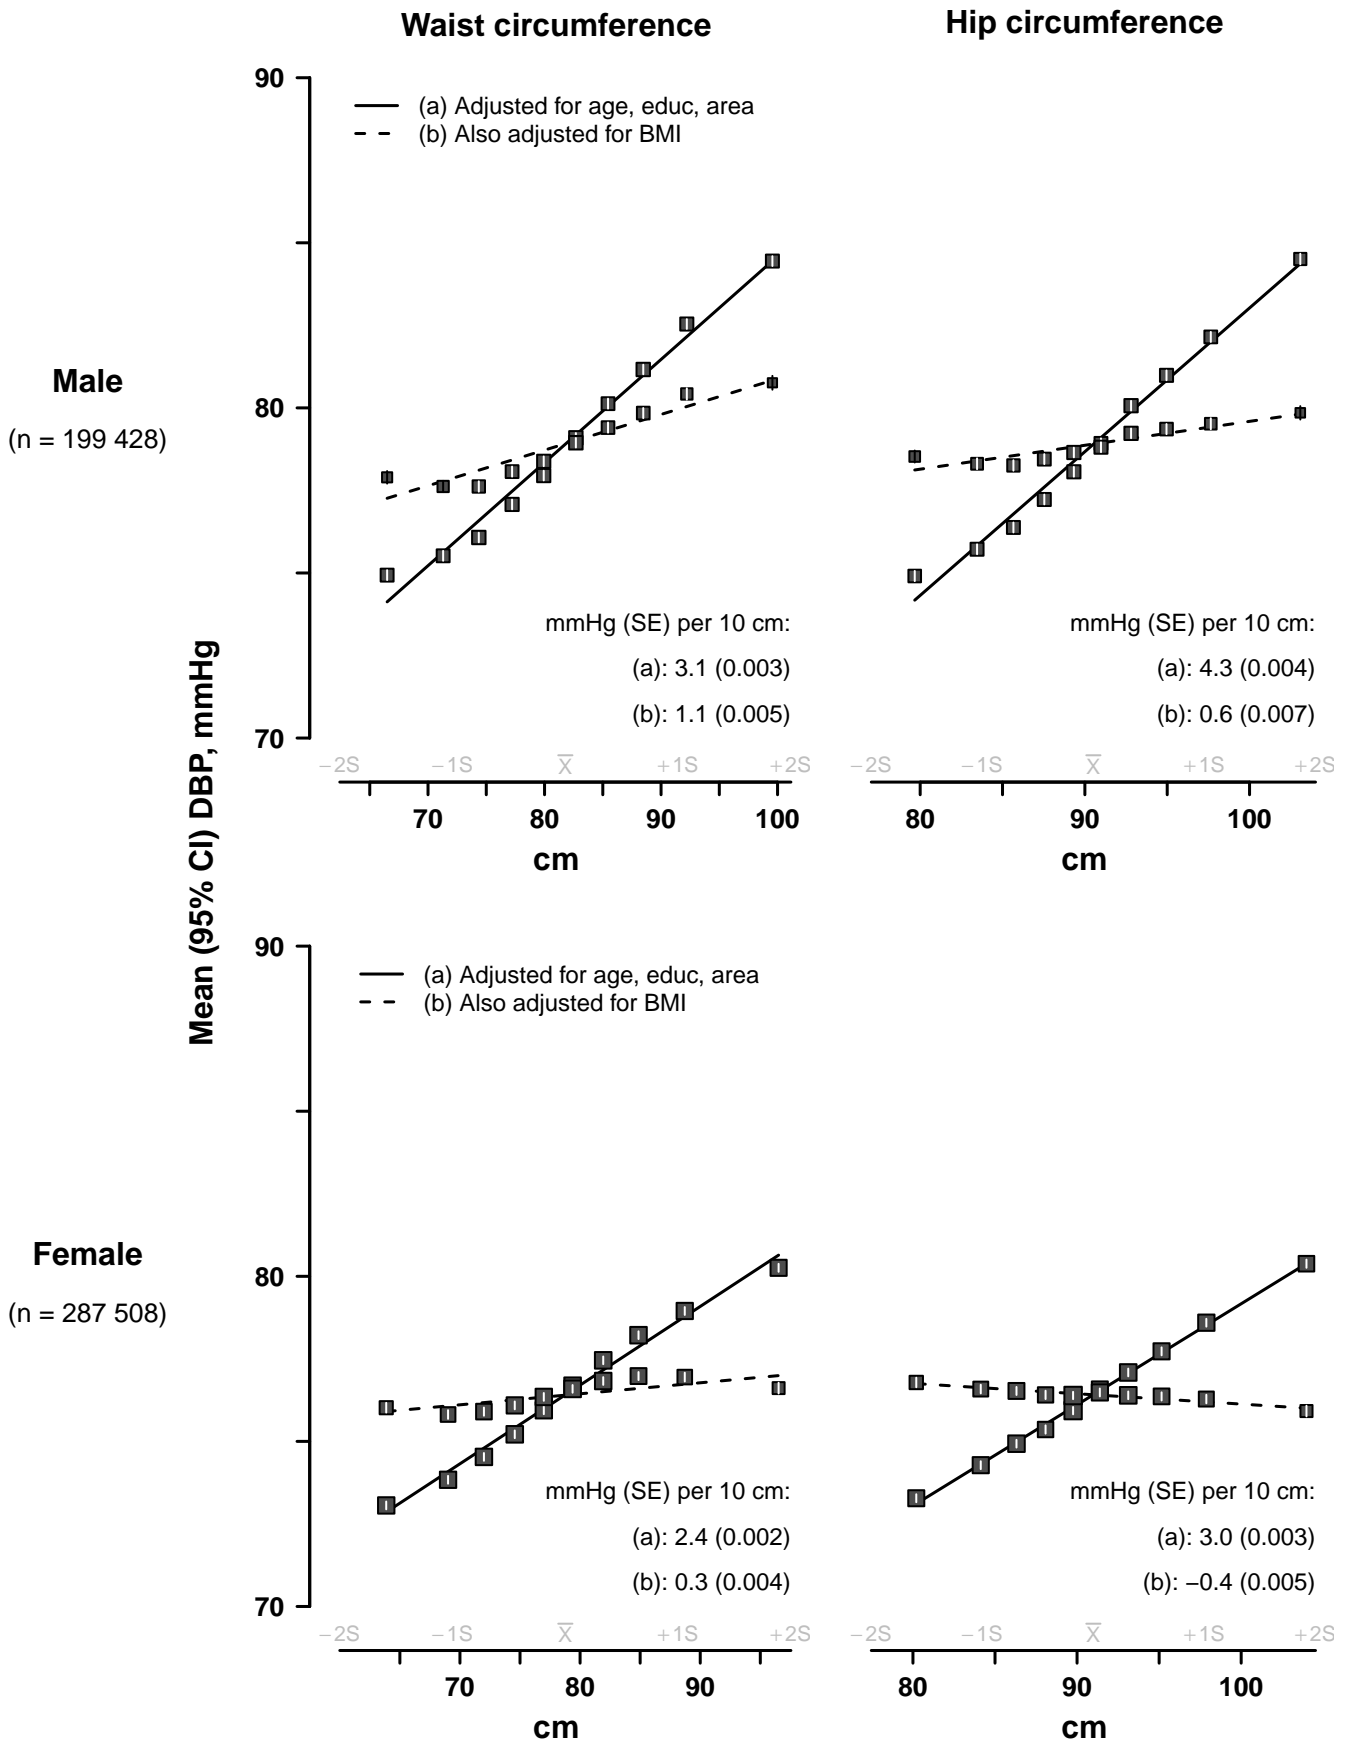

**Web figure 4. Diastolic blood pressure versus waist-hip ratio and body fat percent, before (solid lines) and after (dashed lines) adjustment for BMI or waist circumference**

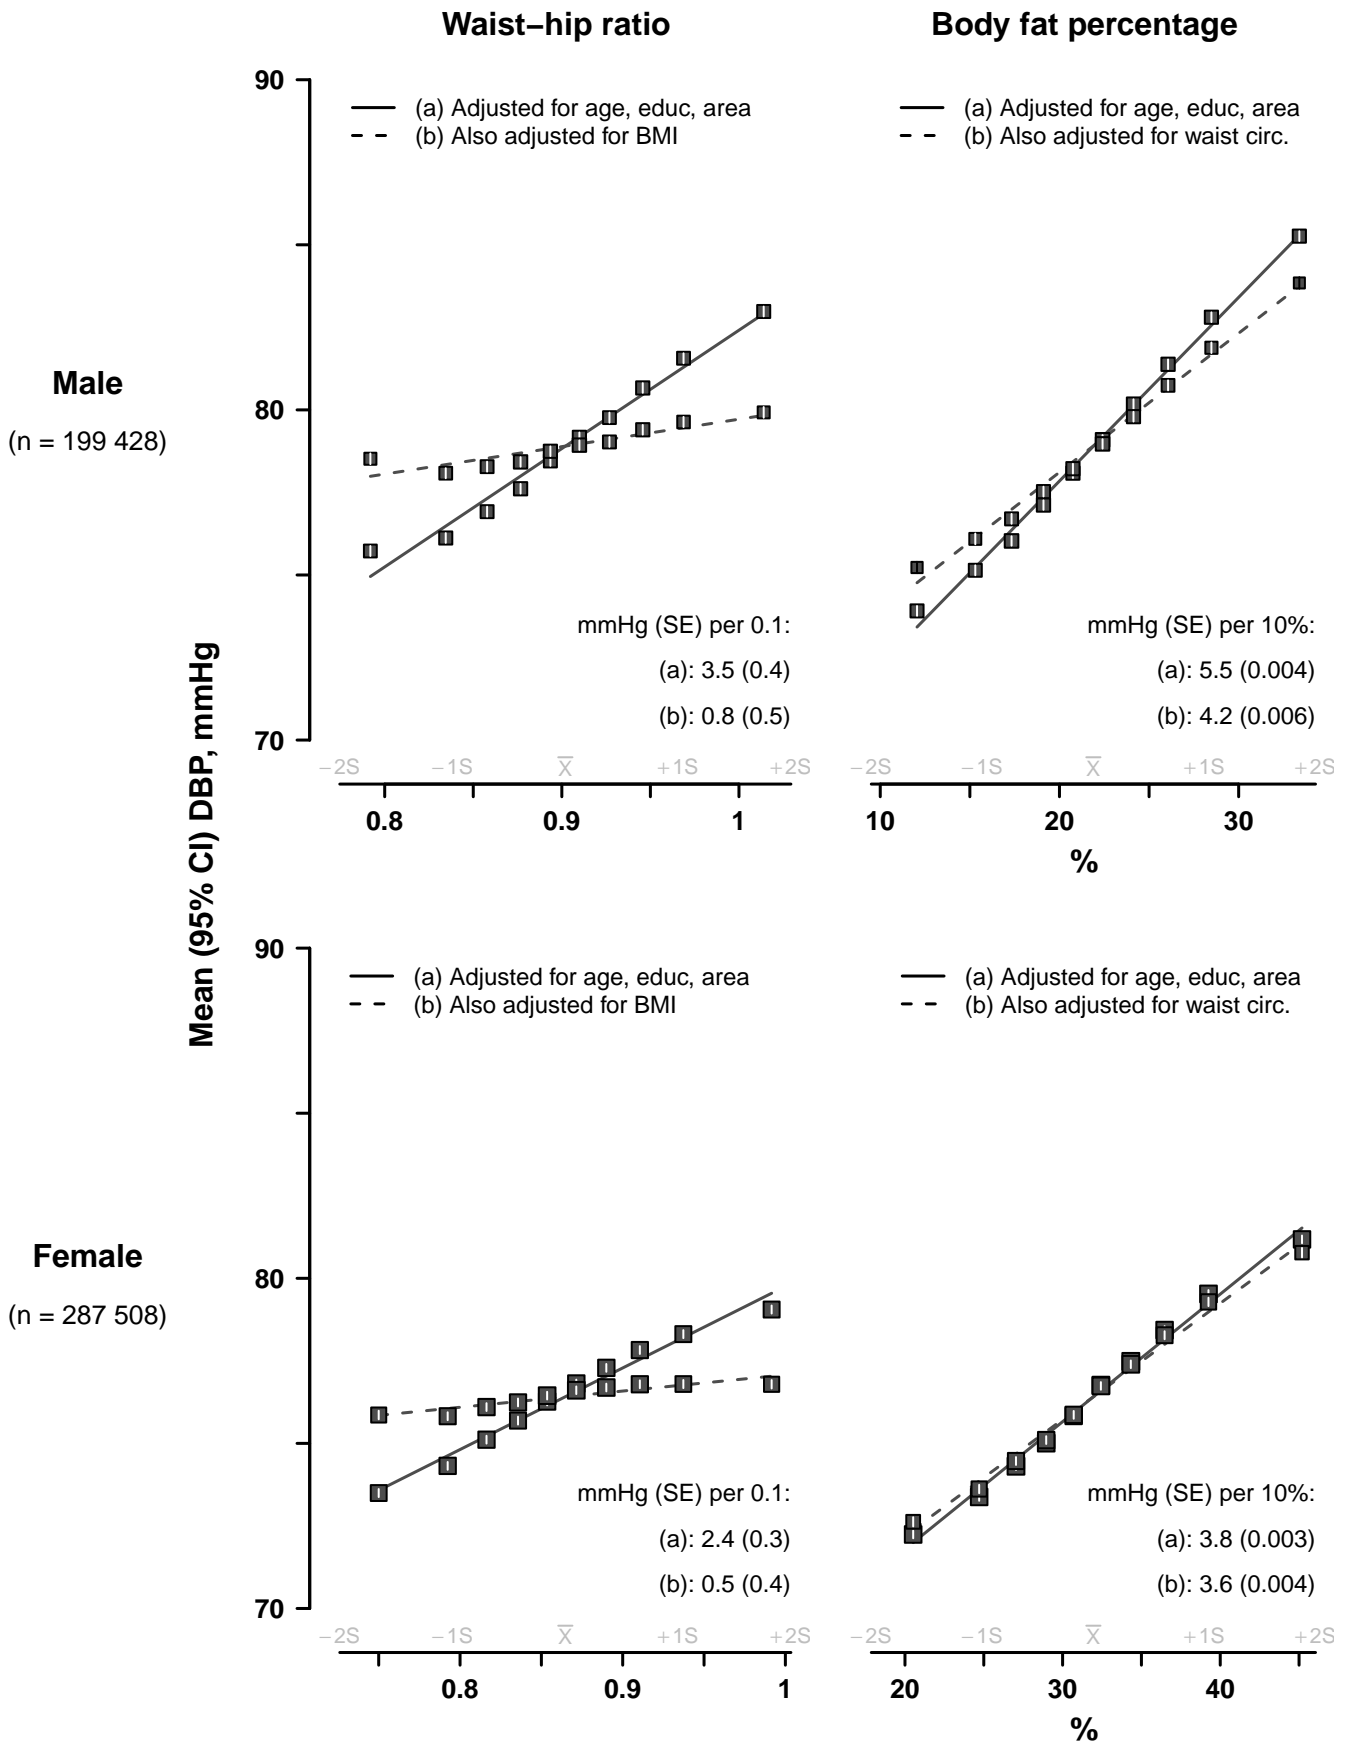

## Web figure 5. Higher DBP per standard deviation of each adiposity measures among 199 428 males

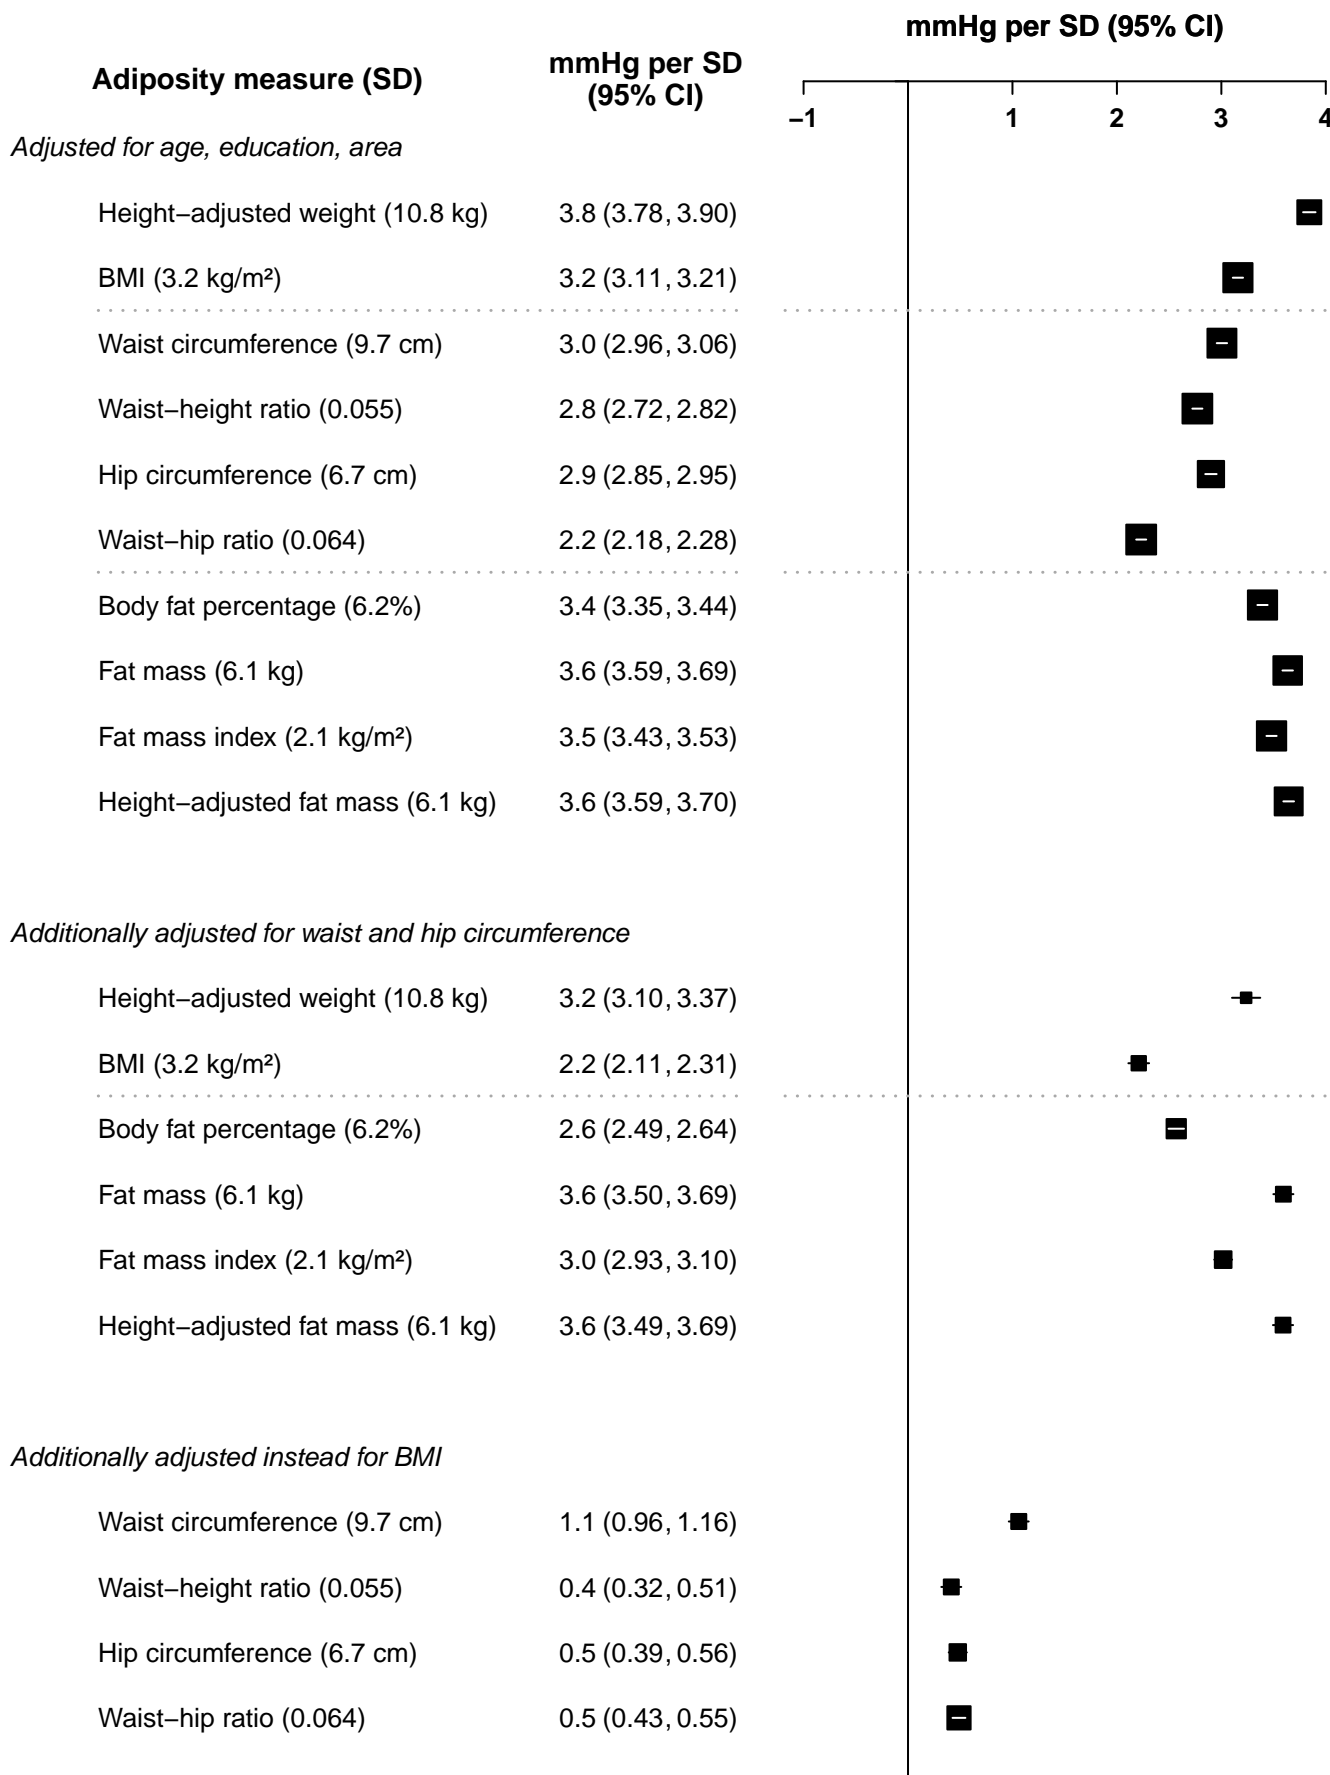

## Web figure 6. Higher DBP per standard deviation of each adiposity measures among 287 508 females

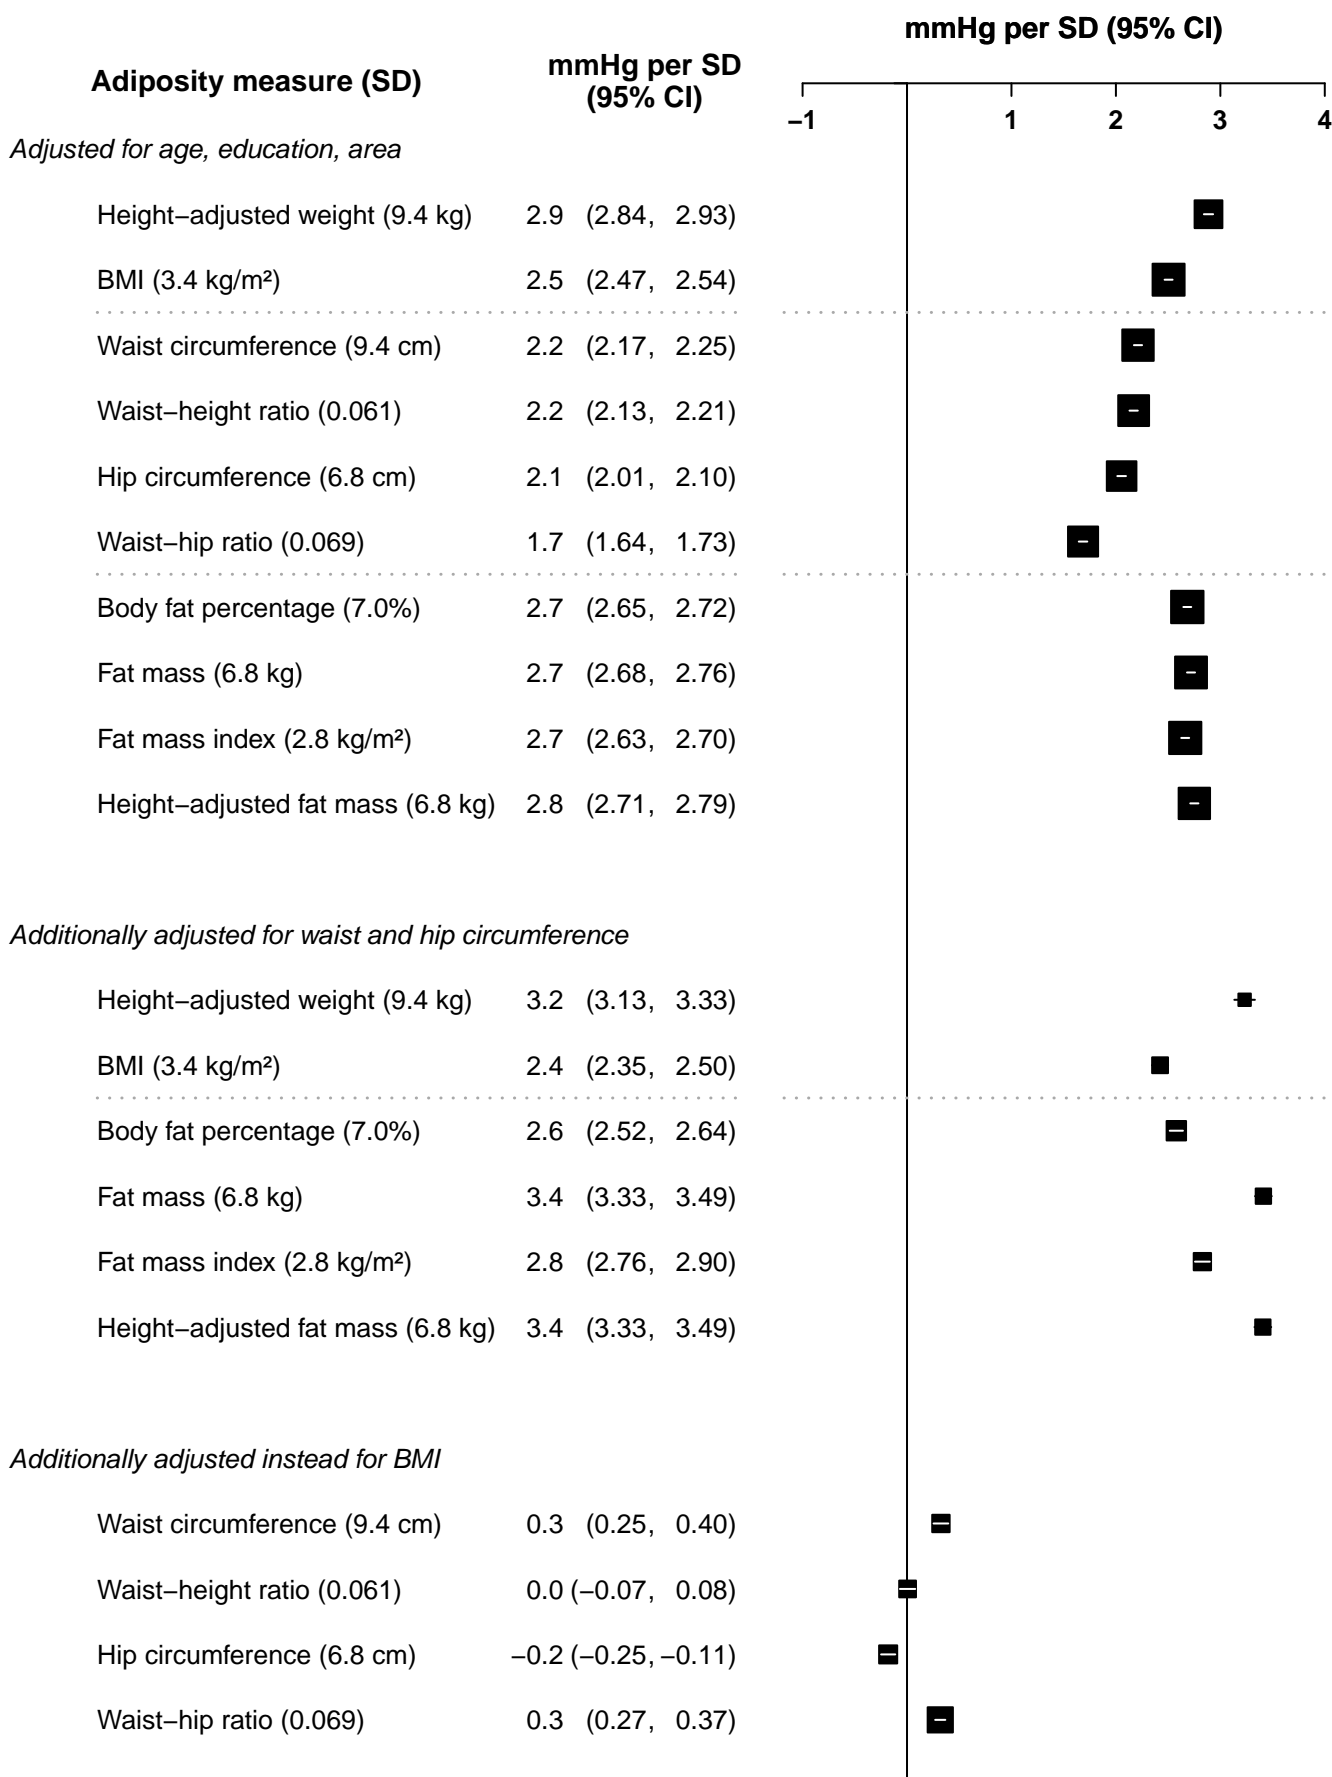

## Web figure 7. Higher DBP per 10 kg/m<sup>2</sup> of BMI by different personal characteristics

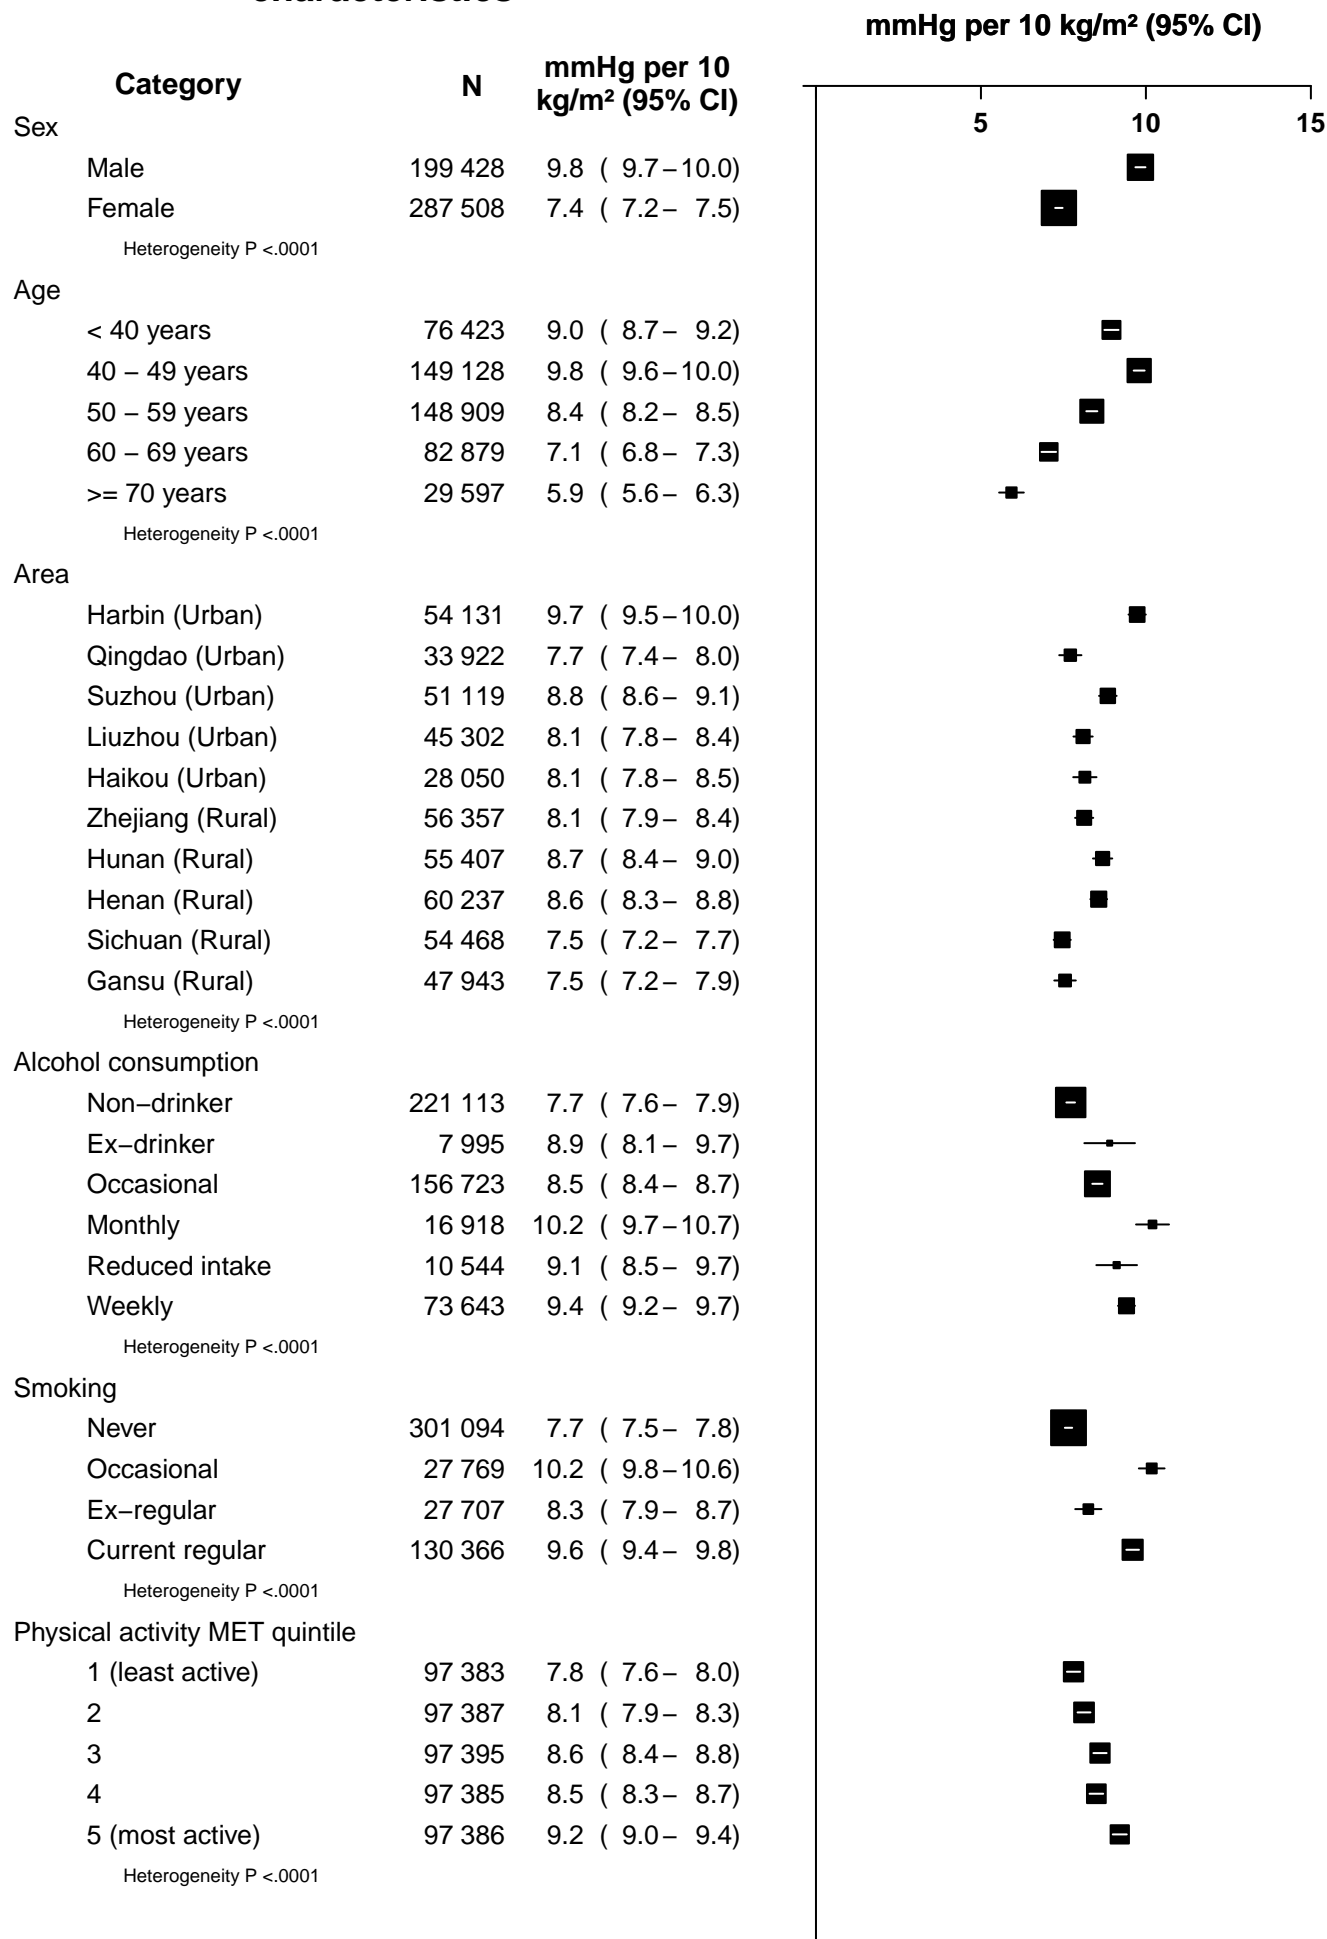

Adjusted for age, area, education, and sex as appropriate.
